# Supplementary material
Source: PubMed Central journal article supplement (PMC3466611)
Supplement: NIHMS379849-supplement-Supp_Figure_S1.pdf [file NIHMS379849-supplement-Supp_Figure_S1.pdf]

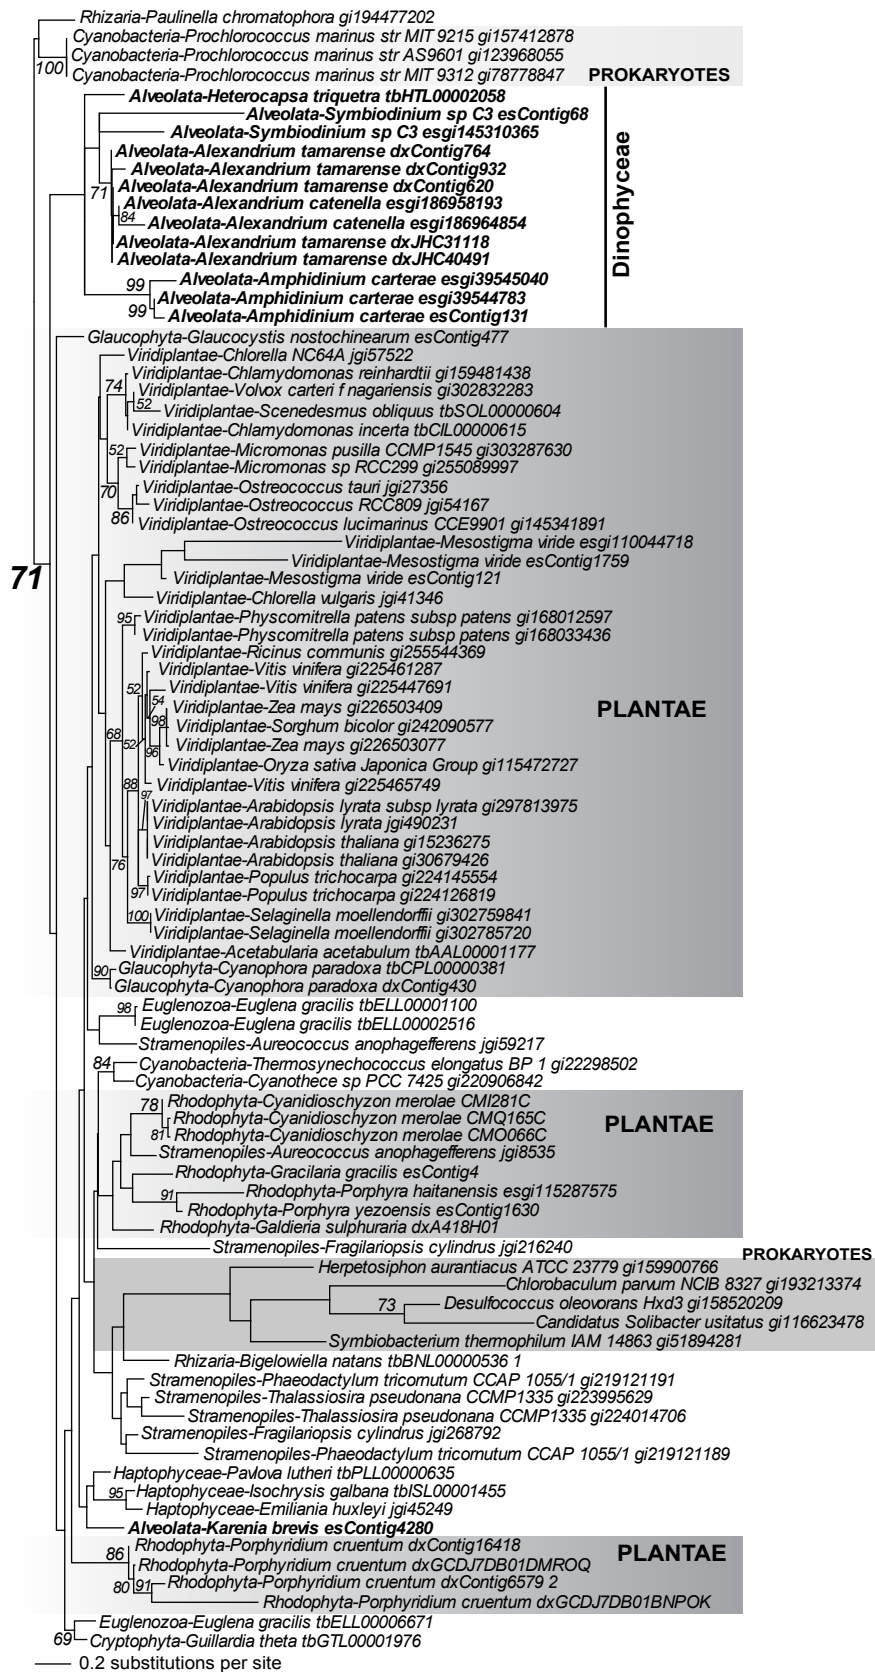

**FIGURE S1.** Phylogeny of cytochrome b6-f complex iron-sulfur subunit that provides evidence of putative EGT among the Plantae lineages and other photosynthetic eukaryotes, including dinoflagellates. Non-parametric bootstrap support values  $\geq 50\%$  are shown at the nodes of the tree. Dinoflagellates are highlighted in bold-face. The lineages of dinoflagellates and Plantae constitute  $>70\%$  of the lineages within the strongly supported clade (bootstrap 71%). The unit of branch length is in the number of substitutions per site.
