# Supplementary material
Source: PubMed Central journal article supplement (PMC3466611)
Supplement: NIHMS379849-supplement-Supp_Figure_S2.pdf [file NIHMS379849-supplement-Supp_Figure_S2.pdf]

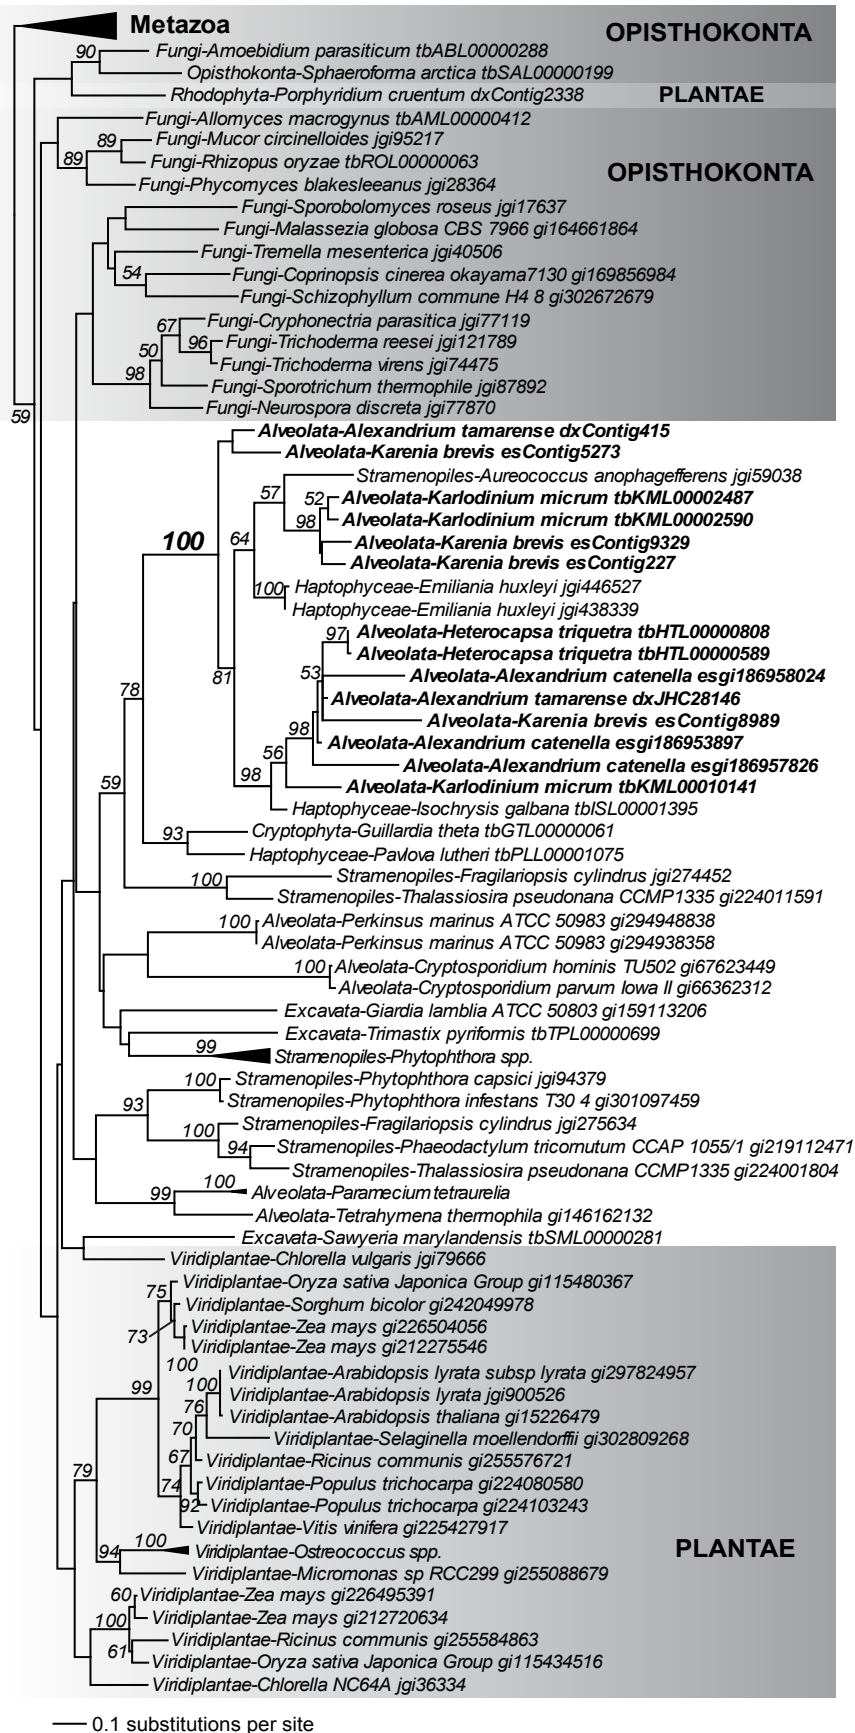

**FIGURE S2.** Phylogeny of triose-phosphate isomerase that shows evidence of putative E/HGT among chromalveolates. Non-parametric bootstrap support values  $\geq 50\%$  are shown at the nodes of the tree. Dinoflagellates are highlighted in bold-face. The unit of branch length is in the number of substitutions per site.
