# Supplementary material
Source: PubMed Central journal article supplement (PMC3466611)
Supplement: NIHMS379849-supplement-Supp_Table_S1.pdf [file NIHMS379849-supplement-Supp_Table_S1.pdf]

**Table S1.** The number of protein sequences in the database that was used for the phylogenomic analysis (based on phyla).

| Grouping                           | Species/Strain | RefSeq            | JGI            | EST <sup>1</sup> | Independent <sup>2</sup> | Total             |
|------------------------------------|----------------|-------------------|----------------|------------------|--------------------------|-------------------|
| Archaea                            | 121            | 225,867           | 0              | 0                | 0                        | 225,867           |
| Bact-Actinobacteria                | 282            | 994,292           | 0              | 0                | 0                        | 994,292           |
| Bact-Aquificae                     | 10             | 19,325            | 0              | 0                | 0                        | 19,325            |
| Bact-BacteroidetesChlorobi         | 141            | 450,081           | 0              | 0                | 0                        | 450,081           |
| Bact-ChlamydiaeVerrucomicrobia     | 38             | 79,759            | 0              | 0                | 0                        | 79,759            |
| Bact-Chloroflexi                   | 15             | 52,585            | 0              | 0                | 0                        | 52,585            |
| Bact-Cyanobacteria                 | 68             | 225,555           | 0              | 0                | 0                        | 225,555           |
| Bact-Deferribacteres               | 2              | 5,338             | 0              | 0                | 0                        | 5,338             |
| <b>PROKARYOTES</b> Bact-Deinococci | 12             | 26,191            | 0              | 0                | 0                        | 26,191            |
| Bact-Dictyoglomi                   | 2              | 3,656             | 0              | 0                | 0                        | 3,656             |
| Bact-Elusimicrobia                 | 2              | 2,305             | 0              | 0                | 0                        | 2,305             |
| Bact-Environmental                 | 2              | 408               | 0              | 0                | 0                        | 408               |
| Bact-FibrobacteresAcidobacteria    | 6              | 28,629            | 0              | 0                | 0                        | 28,629            |
| Bact-Firmicutes                    | 759            | 2,099,809         | 0              | 0                | 0                        | 2,099,809         |
| Bact-Fusobacteria                  | 25             | 59,335            | 0              | 0                | 0                        | 59,335            |
| Bact-Gemmatimonadetes              | 1              | 3,935             | 0              | 0                | 0                        | 3,935             |
| Bact-Nitrospirae                   | 3              | 6,366             | 0              | 0                | 0                        | 6,366             |
| Bact-Planctomycetes                | 6              | 36,794            | 0              | 0                | 0                        | 36,794            |
| Bact-Proteobacteria                | 1239           | 4,251,165         | 0              | 0                | 0                        | 4,251,165         |
| Bact-Spirochaetes                  | 44             | 72,342            | 0              | 0                | 0                        | 72,342            |
| Bact-Synergistetes                 | 6              | 13,162            | 0              | 0                | 0                        | 13,162            |
| Bact-Tenericutes                   | 55             | 32,455            | 0              | 0                | 0                        | 32,455            |
| Bact-Thermotogae                   | 11             | 20,807            | 0              | 0                | 0                        | 20,807            |
| Bact-Unclassified                  | 9              | 17,518            | 0              | 0                | 0                        | 17,518            |
| Alveolata                          | 70             | 167,836           | 0              | 584,904          | 0                        | 752,740           |
| Amoebozoa                          | 22             | 30,550            | 12,410         | 138,624          | 0                        | 181,584           |
| Cryptophyta                        | 8              | 1,419             | 0              | 40,320           | 0                        | 41,739            |
| Excavata                           | 30             | 134,643           | 0              | 443,424          | 0                        | 578,067           |
| <b>EUKARYOTES</b> Haptophyta       | 5              | 140               | 39,124         | 56,868           | 0                        | 96,132            |
| Opisthokonta-Choanoflagellida      | 4              | 9,203             | 0              | 74,886           | 0                        | 84,089            |
| Opisthokonta-Fungi                 | 186            | 569,377           | 212,456        | 132,168          | 0                        | 914,001           |
| Opisthokonta-Metazoa               | 2120           | 1,067,024         | 140,855        | 30,108           | 0                        | 1,237,987         |
| Opisthokonta-Others                | 4              | 0                 | 0              | 46,494           | 0                        | 46,494            |
| Plantae-Glaucophyta                | 3              | 149               | 0              | 57,696           | 0                        | 57,845            |
| Plantae-Rhodophyta                 | 23             | 1,168             | 0              | 331,482          | 28,975                   | 361,625           |
| Plantae-Viridiplantae              | 228            | 385,435           | 114,102        | 114,294          | 0                        | 613,831           |
| Rhizaria                           | 5              | 1,211             | 0              | 29,112           | 0                        | 30,323            |
| Stramenopiles                      | 47             | 41,980            | 81,762         | 96,078           | 0                        | 219,820           |
| Vira                               | 2475           | 84,202            | 0              | 0                | 0                        | 84,202            |
| Others                             | 39             | 1,062             | 0              | 0                | 0                        | 1,062             |
| <b>Total</b>                       | <b>8,128</b>   | <b>11,223,078</b> | <b>600,709</b> | <b>2,176,458</b> | <b>28,975</b>            | <b>14,029,220</b> |

<sup>1</sup> The actual numbers of EST contigs are the numbers in this column divided by 6 due to six-frame translations.

<sup>2</sup> These data represent protein models from *Cyanidioschyzon merolae* and *Calliarthron tuberculosis*.
